# Supplementary material
Source: publisher site journal article supplement (https://static.cambridge.org/content/id/urn:cambridge.org:id:article:S001675681800078X/resource/name/S001675681800078Xsupp003.xlsx)
Supplement: Supplementary file 1 [file S001675681800078Xsupp003.xlsx]

## Sheet: Table S2
Geological Magazine,Modelling the partial melting of meta-sediments in low pressure regional contact aureole: the effect of water and whole rock composition,Wei-(RZ) Wang, Geoffrey Clarke, Nathan R. Daczko, Yue Zhao,Supplementary Material.
Supplementary Table S3.
ST1123A1pe		SiO2	Al2O3	CaO	MgO	Fe2O3	K2O	Na2O	TiO2	Fe2O3+MgO	CaO+K2O+Na2O	melt removed
		(wt%)	(wt%)	(wt%)	(wt%)	(wt%)	(wt%)	(wt%)	(wt%)	(wt%)	(wt%)	(mol.%)
total H2O=3.2 mol.% (free H2O=0)
750°C	3.6 kbar	56.2984	24.3352	0.458708	2.09123	7.52538	7.21745	1.22799	0.845707	9.61661	8.90414	8.36
800°C	3.75 kbar	55.5021	24.7294	0.447654	2.19977	7.78665	7.24905	1.19912	0.886269	9.98642	8.89582	13.45
total H2O=4.2 mol.% (free H2O=1 mol.%)
750°C	3.6 kbar	55.4859	24.7559	0.459941	2.19703	7.80081	7.25585	1.15929	0.885221	9.99784	8.87508	13.81
800°C	3.75 kbar	54.426	25.2599	0.436582	2.34725	8.25745	7.23988	1.10247	0.930521	10.6047	8.77894	20
1107spe		SiO2	Al2O3	CaO	MgO	Fe2O3	K2O	Na2O	TiO2	Fe2O3+MgO	CaO+K2O+Na2O	melt removed
		(wt%)	(wt%)	(wt%)	(wt%)	(wt%)	(wt%)	(wt%)	(wt%)	(wt%)	(wt%)	(mol.%)
total H2O=2.2 mol.% (free H2O=0)
750°C	3.6 kbar	68.8598	17.4966	0.163581	1.7802	6.09997	4.43508	0.465921	0.698839	7.88016	5.06458	4.99
800°C	3.75 kbar	68.6659	17.5618	0.141819	1.8425	6.29606	4.33315	0.437111	0.721585	8.13856	4.91208	8.5
total H2O=3.2 mol.% (free H2O=1 mol.%)
750°C	3.6 kbar	68.3947	17.7084	0.142602	1.88352	6.444	4.2875	0.398187	0.741108	8.32752	4.82829	11.17
800°C	3.75 kbar	68.0646	17.8057	0.0978447	1.99672	6.80258	4.08805	0.359427	0.785028	8.7993	4.54532	16.54
1107ps		SiO2	Al2O3	CaO	MgO	Fe2O3	K2O	Na2O	TiO2	Fe2O3+MgO	CaO+K2O+Na2O	melt removed
		(wt%)	(wt%)	(wt%)	(wt%)	(wt%)	(wt%)	(wt%)	(wt%)	(wt%)	(wt%)	(mol.%)
total H2O=2.7 mol.% (free H2O=0)
750°C	3.6 kbar	72.8024	12.7744	0.139866	1.63067	7.68992	3.81257	0.543545	0.606665	9.3206	4.49598	4.88
800°C	3.75 kbar	72.5911	12.7582	0.105463	1.7958	8.09183	3.5517	0.440114	0.665742	9.88763	4.09728	12.75
total H2O=3.7 mol.% (free H2O=1 mol.%)
750°C	3.6 kbar	72.5833	12.7147	0.123858	1.72184	8.1205	3.6558	0.437417	0.642662	9.84233	4.21707	11.01
800°C	3.75 kbar	72.3481	12.7234	0.0794425	1.9138	8.60961	3.26948	0.339602	0.716504	10.5234	3.68852	19.79
ST1120Bps		SiO2	Al2O3	CaO	MgO	Fe2O3	K2O	Na2O	TiO2	Fe2O3+MgO	CaO+K2O+Na2O	melt removed
		(wt%)	(wt%)	(wt%)	(wt%)	(wt%)	(wt%)	(wt%)	(wt%)	(wt%)	(wt%)	(mol.%)
total H2O=1.81 mol.% (free H2O=0)
750°C	3.6 kbar	76.7087	12.0513	0.531075	1.20876	4.35281	3.43414	1.18866	0.52456	5.56157	5.15388	3.43
800°C	3.75 kbar	76.8158	11.9855	0.535613	1.29626	4.43366	3.27681	1.1011	0.555264	5.72992	4.91352	9.11
total H2O=2.81 mol.% (free H2O=1 mol.%)
750°C	3.6 kbar	76.7366	11.9418	0.544115	1.27562	4.57675	3.29007	1.07859	0.556446	5.85238	4.91278	9.58
800°C	3.75 kbar	76.9611	11.8584	0.544461	1.38287	4.64616	3.03511	0.969895	0.60195	6.02903	4.54947	16.78
